# Supplementary material
Source: PubMed Central journal article supplement (PMC452584)

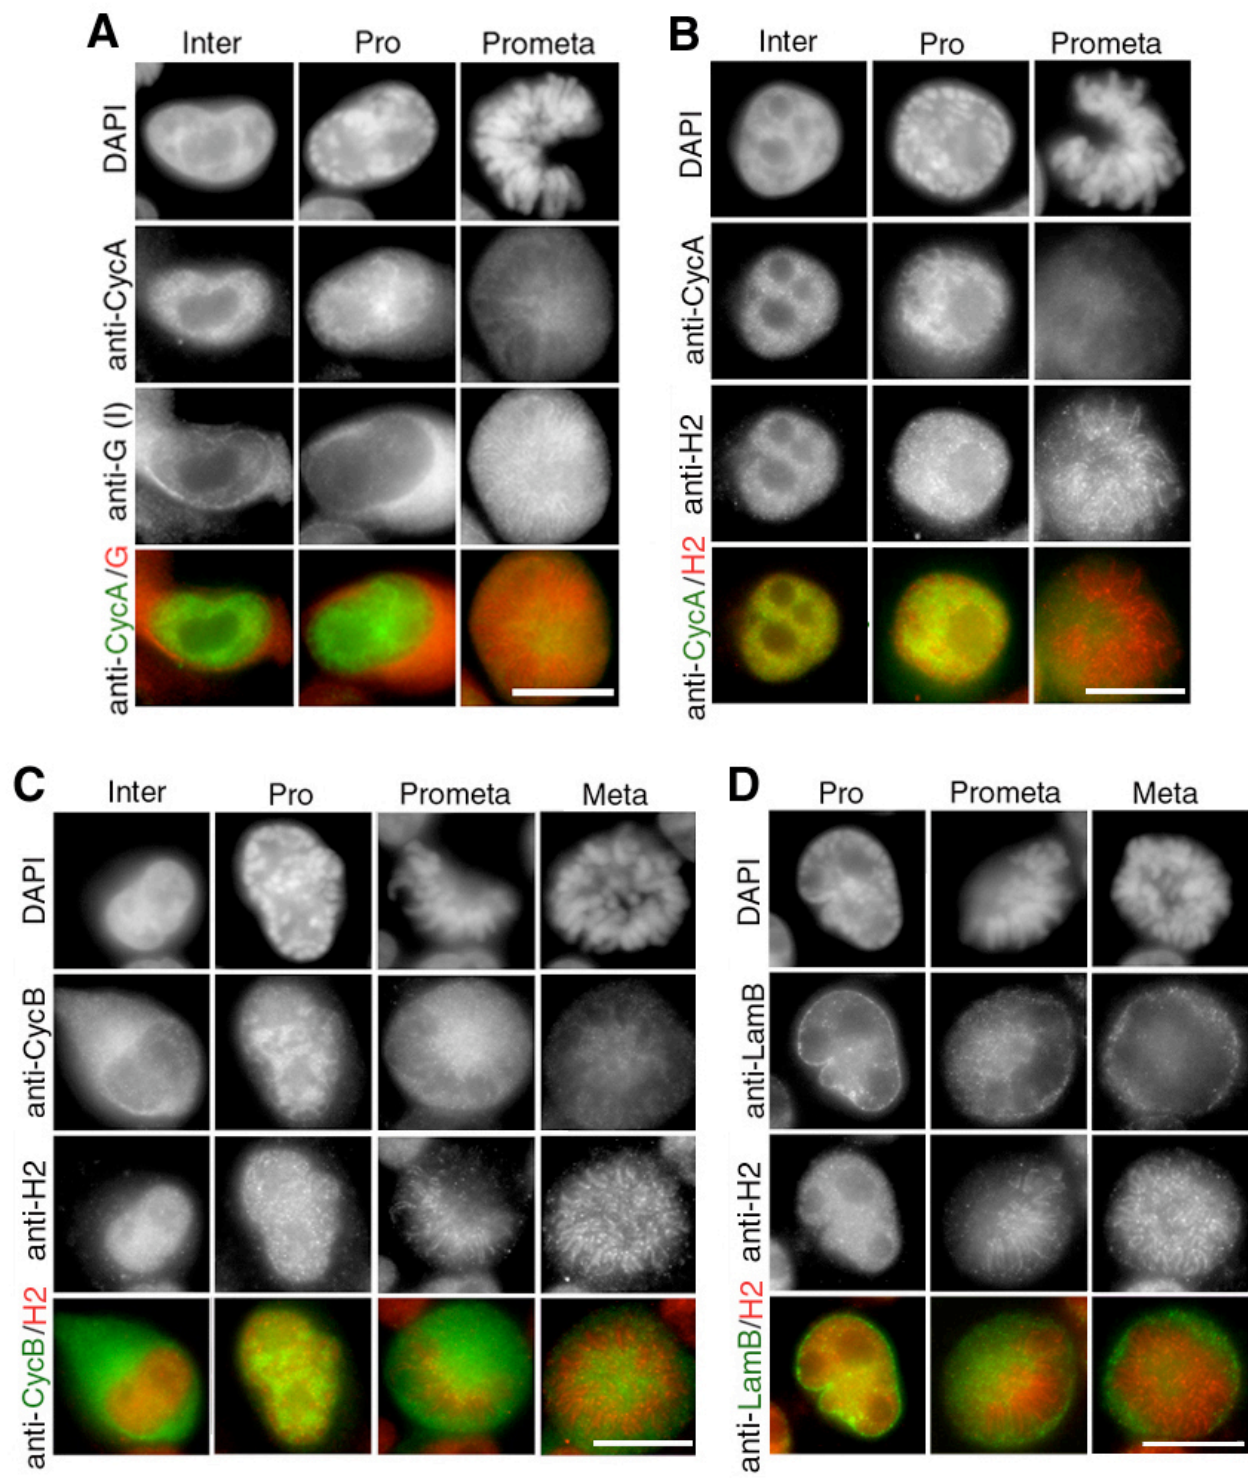

Supplement: mbc_15_7_3296__1.pdf [file mbc_15_7_3296__1.pdf]

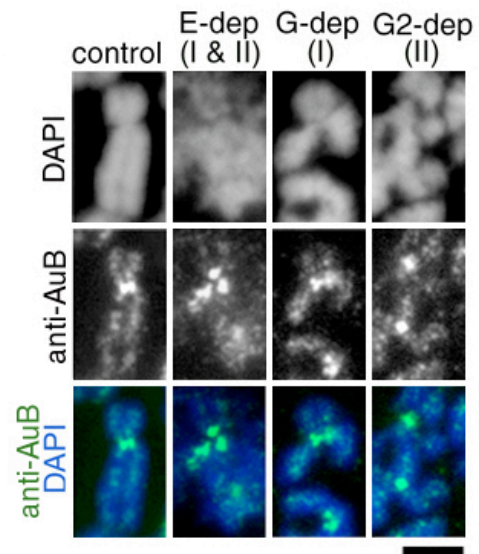

Supplement: mbc_15_7_3296__2.pdf [file mbc_15_7_3296__2.pdf]
